# Supplementary material for: Hygiene practices and factors influencing intestinal parasites among food handlers in the province of Belgarn, Saudi Arabia
Source: PeerJ journal article supplement (doi:10.7717/peerj.14700), 2023-01-20
Supplement: Questionnaire-Final.pdf [file Questionnaire-Final.pdf]

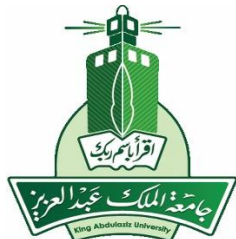

إستمارة إستبيان - العدوى الطفيلية المعوية بين العاملين في مجال الغذاء في محافظة بلقرن

Intestinal Parasitic Infection among Food Handlers in Belgarn Province -Questionnaire Form

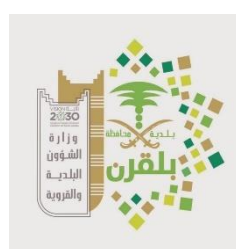

Serial #:

الرقم التسلسلي:

Shop name:

إسم المحل:

Contact No.:

رقم الجوال:

|                                                                                                                                                         |
|---------------------------------------------------------------------------------------------------------------------------------------------------------|
| Name:                                                                                                                                                   |
| Gender: 1) Male 2) Female                                                                                                                               |
| Age (years): 3) 20-29 4) 30-39 5) 40-49 6) 50-60                                                                                                        |
| Nationality: 7) Indian 8) Bangladeshi 9) Saudi 10) Yemeni 11) Egyptian 12) Sudanese 13) Syrian 14) Afghan<br>15) Pakistani 16) Turkish 17) Others ..... |
| Weight (kg):                                                                                                                                            |
| Height (cm):                                                                                                                                            |
| Marital status: 18) Single 19) Married 20) Others .....                                                                                                 |
| Educational status: 21) Illiterate 22) Primary School 23) Middle School 24) High School 25) Bach. or higher                                             |
| Responsibility: 26) Cooker 27) Waiter and/dish washer 28) Serving both                                                                                  |
| Monthly income (SAR): 29) < 1000 30) 1000-1999 31) 2000-2999 32) >3000                                                                                  |
| Establishment type: 33) Restaurant 34) Cafeteria 35) Pizza shop 36) Confectionery 37) Coffee shop 38) Bakery<br>39) Ice cream and juice shop            |
| Years of residency in Saudi Arabia: 40) < 1 41) 1-5 42) 6-10 43) > 10                                                                                   |
| The period of stay from the last vacation: 44) < 6 months 45) 6 - < 12 months 46) 1-2 years 47) > 2 years                                               |
| Accommodation type: 48) With other workers 49) With family 50) Alone                                                                                    |
| Drinking water source: 51) Bottled 52) Filtered 53) Tap 54) Wells                                                                                       |
| Awareness about intestinal parasites: 55) Aware 56) Not aware 57) Not sure                                                                              |
| Complain from abdominal symptoms: 58) Yes 59) No                                                                                                        |
| Uniform/gown usage/gloves: 60) Yes 61) No                                                                                                               |
| Washing hands before handling and preparing food: 62) Yes, with soap 63) Yes, without soap 64) Rarely 65) No                                            |
| Washing hands before meals: 66) Yes, with soap 67) Yes, without soap 68) Rarely 69) No                                                                  |
| Washing hands after using toilet: 70) Yes, with soap 71) Yes, without soap 72) Rarely 73) No                                                            |
| Frequency of having shower: 74) Once per week 75) 2-3 times per week 76) > 4 times per week                                                             |
| Having trimmed fingernails: 77) Yes 78) No                                                                                                              |
| Validity of health card: 79) Valid 80) Expired                                                                                                          |

More information:
