# Supplementary material for: Hygiene practices and factors influencing intestinal parasites among food handlers in the province of Belgarn, Saudi Arabia
Source: PeerJ. 2023 Jan 20;11:e14700. doi: 10.7717/peerj.14700 (PMC9869772; doi:10.7717/peerj.14700)
Supplement: Supplemental Information 1 [file peerj-11-14700-s001.xlsx]

## Sheet: All Data
Name	Gender	Age	Nationality	Weight	Height	Marital status	Educational status	Responsibility	Monthly income	Establishment type	Residency in KSA	Stay from last vac.	Accommodation type	Drinking water source	Awareness about I.P.	Abdominal symptoms	Uniform, Gown, Gloves	W.H. bef. Handling, preparing food	W.H. bef. meals	W.H. after toilet	Frequency of shower	Trimmed nails	Valid. Health card	Name
	M	41	Bangladeshi	65	168	Married	Primary School	Waiter and dish washer	1000-1999	Restaurant	>10	>2	With other workers	Bottled	Aware	No	Yes	Yes, with soap	Yes, with soap	Yes, with soap	>4	Yes	Valid
	M	50	Bangladeshi	65	160	Married	Primary School	Cooker	2000-2999	Restaurant	>10	>2	With other workers	Bottled	Aware	No	Yes	Yes, with soap	Yes, with soap	Yes, with soap	>4	Yes	Valid
	M	45	Bangladeshi	73	175	Married	Primary School	Cooker	2000-2999	Restaurant	>10	1_2	With other workers	Bottled	Not aware	No	Yes	Yes, with soap	Yes, with soap	Yes, with soap	>4	No	Valid
	M	50	Bangladeshi	75	177	Married	Primary School	Waiter and dish washer	2000-2999	Restaurant	>10	1_2	With other workers	Bottled	Aware	No	Yes	Yes, with soap	Yes, with soap	Yes, with soap	>4	Yes	Valid
	M	30	Afghan	80	178	Married	Illiterate	Cooker	>3000	Restaurant	6_10	>2	With other workers	Filtered	Aware	No	Yes	Yes, with soap	Yes, with soap	Yes, with soap	>4	Yes	Valid
	M	40	Bangladeshi	60	160	Married	Primary School	Waiter and dish washer	2000-2999	Restaurant	>10	>2	With other workers	Bottled	Aware	No	No	Yes, with soap	Yes, with soap	Yes, with soap	>4	No	Valid
	M	55	Pakistani	60	168	Married	Primary School	Cooker	2000-2999	Restaurant	>10	>2	With other workers	Filtered	Aware	No	No	Yes, with soap	Yes, without soap	Yes, with soap	>4	Yes	Expired
	M	30	Pakistani	85	180	Married	Primary School	Cooker	1000-1999	Restaurant	6_10	1_2	With other workers	Filtered	Not aware	No	Yes	Yes, with soap	Yes, with soap	Yes, with soap	>4	Yes	Valid
	M	45	Indian	55	158	Married	Illiterate	Cooker	2000-2999	Restaurant	>10	>2	With other workers	Filtered	Not aware	No	Yes	Yes, with soap	Yes, with soap	Yes, with soap	>4	No	Expired
	M	40	Bangladeshi	72	170	Married	High School	Cooker	1000-1999	Restaurant	>10	>2	With other workers	Filtered	Aware	No	Yes	Yes, with soap	Yes, with soap	Yes, with soap	>4	Yes	Valid
	M	42	Afghan	82	178	Married	Primary School	Cooker	2000-2999	Restaurant	>10	1_2	With other workers	Bottled	Not aware	No	Yes	Yes, with soap	Yes, with soap	Yes, with soap	2_3	No	Valid
	M	28	Afghan	68	170	Married	High School	Serving both	1000-1999	Restaurant	1_5	< 6 Months	With other workers	Bottled	Not aware	No	Yes	Yes, with soap	Yes, with soap	Yes, with soap	2_3	No	Valid
	M	30	Indian	80	175	Married	Middle School	Waiter and dish washer	1000-1999	Restaurant	6_10	>2	With other workers	Filtered	Aware	No	Yes	Yes, with soap	Yes, with soap	Yes, with soap	>4	Yes	Valid
	M	25	Pakistani	75	180	Single	Illiterate	Cooker	2000-2999	Restaurant	6_10	>2	With other workers	Filtered	Not aware	No	Yes	Yes, with soap	Yes, with soap	Yes, with soap	2_3	Yes	Valid
	M	32	Pakistani	77	175	Married	Primary School	Cooker	1000-1999	Restaurant	6_10	>2	With other workers	Bottled	Not aware	No	Yes	Yes, with soap	Yes, with soap	Yes, with soap	>4	No	Valid
	M	34	Pakistani	87	175	Married	Primary School	Cooker	1000-1999	Restaurant	<1	< 6 Months	With other workers	Bottled	Not aware	No	Yes	Yes, with soap	Yes, with soap	Yes, with soap	>4	No	Valid
	M	20	Pakistani	60	185	Single	High School	Cooker	1000-1999	Restaurant	<1	< 6 Months	With other workers	Bottled	Not aware	No	Yes	Yes, with soap	Yes, with soap	Yes, with soap	>4	No	Valid
	M	25	Afghan	60	160	Married	Illiterate	Cooker	1000-1999	Restaurant	6_10	>2	With other workers	Bottled	Not aware	No	Yes	Yes, with soap	Yes, with soap	Yes, with soap	>4	No	Valid
	M	28	Afghan	62	185	Single	Middle School	Cooker	2000-2999	Restaurant	6_10	>2	With other workers	Bottled	Not aware	No	Yes	Yes, with soap	Yes, with soap	Yes, with soap	>4	Yes	Valid
	M	28	Afghan	74	175	Married	High School	Cooker	1000-1999	Restaurant	6_10	>2	With other workers	Bottled	Not aware	No	Yes	Yes, with soap	Yes, with soap	Yes, with soap	>4	Yes	Valid
	M	38	Jordanian	97	172	Married	Bach. Or higher	Waiter and dish washer	>3000	Restaurant	>10	< 6 Months	With other workers	Bottled	Not aware	No	Yes	Yes, with soap	Yes, with soap	Yes, with soap	>4	Yes	Valid
	M	31	Egyptian	85	179	Married	High School	Cooker	2000-2999	Restaurant	1_5	< 6 Months	With other workers	Bottled	Not aware	No	Yes	Yes, with soap	Yes, without soap	Yes, with soap	>4	Yes	Valid
	M	36	Egyptian	105	186	Married	High School	Cooker	2000-2999	Restaurant	1_5	1_2	With other workers	Filtered	Not aware	No	Yes	Yes, with soap	Yes, with soap	Yes, with soap	>4	Yes	Valid
	M	33	Egyptian	96	175	Married	Middle School	Cooker	2000-2999	Restaurant	6_10	< 6 Months	With other workers	Filtered	Not aware	No	Yes	Yes, with soap	Yes, without soap	Yes, without soap	>4	Yes	Valid
	M	23	Bangladeshi	63	168	Single	High School	Waiter and dish washer	1000-1999	Restaurant	1_5	>2	With other workers	Filtered	Not aware	No	Yes	Yes, with soap	Yes, with soap	Yes, with soap	>4	No	Valid
	M	38	Indian	77	172	Married	Middle School	Cooker	<1000	Cafeteria	>10	>2	With other workers	Filtered	Not aware	No	Yes	Yes, without soap	Yes, without soap	Yes, without soap	>4	Yes	Valid
	M	28	Indian	65	170	Married	High School	Cooker	<1000	Cafeteria	1_5	1_2	With other workers	Filtered	Not aware	No	Yes	Yes, without soap	Yes, without soap	Yes, without soap	>4	No	Valid
	M	49	Indian	55	160	Married	Primary School	Cooker	<1000	Cafeteria	6_10	>2	With other workers	Filtered	Not aware	No	Yes	Yes, without soap	Yes, without soap	Yes, without soap	>4	No	Valid
	M	26	Afghan	90	178	Married	Illiterate	Cooker	2000-2999	Restaurant	6_10	>2	With other workers	Bottled	Not aware	Yes	Yes	Yes, with soap	Yes, with soap	Yes, with soap	2_3	No	Valid
	M	32	Pakistani	87	185	Married	Illiterate	Cooker	2000-2999	Restaurant	6_10	< 6 Months	With other workers	Filtered	Not aware	No	Yes	Yes, with soap	Yes, with soap	Yes, with soap	>4	No	Valid
	M	28	Pakistani	88	168	Married	Illiterate	Cooker	2000-2999	Restaurant	6_10	>2	With other workers	Bottled	Not aware	No	Yes	Yes, with soap	Yes, with soap	Yes, with soap	>4	Yes	Valid
	M	20	Burmese	57	170	Single	High School	Waiter and dish washer	2000-2999	Restaurant	>10	>2	With other workers	Bottled	Not sure	No	Yes	Yes, with soap	Yes, without soap	Yes, with soap	2_3	No	Expired
	M	31	Pakistani	50	148	Married	High School	Cooker	1000-1999	Restaurant	1_5	1_2	With other workers	Filtered	Not aware	No	Yes	Yes, with soap	Yes, with soap	Yes, with soap	>4	No	Expired
	M	45	Bangladeshi	80	168	Married	High School	Cooker	2000-2999	Restaurant	>10	>2	With other workers	Filtered	Not aware	No	Yes	Yes, with soap	Yes, with soap	Yes, with soap	>4	No	Expired
	M	39	Nepalese	52	150	Married	High School	Waiter and dish washer	2000-2999	Restaurant	>10	< 6 Months	With other workers	Filtered	Not aware	No	Yes	Yes, with soap	Yes, with soap	Yes, with soap	>4	Yes	Valid
	M	23	Bangladeshi	50	158	Single	High School	Cooker	1000-1999	Restaurant	<1	6-< 12 Months	With other workers	Filtered	Aware	No	Yes	Yes, with soap	Yes, with soap	Yes, with soap	>4	No	Valid
	M	22	Yemeni	55	160	Single	Middle School	Cooker	2000-2999	Restaurant	1_5	1_2	With other workers	Filtered	Not aware	No	Yes	Yes, with soap	Yes, with soap	Yes, with soap	>4	Yes	Expired
	M	38	Bangladeshi	68	158	Married	High School	Cooker	1000-1999	Restaurant	1_5	>2	With other workers	Filtered	Aware	No	Yes	Yes, with soap	Yes, with soap	Yes, with soap	>4	Yes	Expired
	M	37	Bangladeshi	65	160	Married	High School	Waiter and dish washer	1000-1999	Restaurant	1_5	1_2	With other workers	Filtered	Not aware	No	Yes	Yes, with soap	Yes, with soap	Yes, with soap	>4	Yes	Expired
	M	23	Burmese	70	168	Single	Middle School	Waiter and dish washer	2000-2999	Restaurant	>10	>2	With other workers	Filtered	Aware	No	Yes	Yes, with soap	Yes, with soap	Yes, with soap	>4	No	Expired
	M	39	Nepalese	65	168	Married	Primary School	Cooker	2000-2999	Restaurant	>10	>2	With other workers	Filtered	Not aware	No	Yes	Yes, with soap	Yes, with soap	Yes, with soap	>4	Yes	Expired
	M	30	Indian	52	165	Married	High School	Waiter and dish washer	1000-1999	Restaurant	1_5	1_2	With other workers	Filtered	Not aware	No	Yes	Yes, with soap	Yes, with soap	Yes, with soap	>4	Yes	Expired
	M	43	Indian	62	165	Married	Primary School	Cooker	2000-2999	Restaurant	6_10	1_2	With other workers	Filtered	Not aware	No	Yes	Yes, with soap	Yes, with soap	Yes, with soap	>4	No	Expired
	M	53	Yemeni	55	159	Married	Primary School	Cooker	1000-1999	Restaurant	>10	< 6 Months	With other workers	Filtered	Not aware	No	Yes	Yes, with soap	Yes, with soap	Yes, with soap	>4	Yes	Expired
	M	25	Indonesian	52	160	Married	High School	Cooker	1000-1999	Restaurant	1_5	>2	With other workers	Filtered	Aware	No	Yes	Yes, with soap	Yes, with soap	Yes, with soap	>4	Yes	Expired
	M	35	Sudanese	57	170	Married	Primary School	Cooker	2000-2999	Restaurant	1_5	1_2	With other workers	Filtered	Not aware	Yes	Yes	Yes, with soap	Yes, with soap	Yes, with soap	>4	No	Valid
	M	30	Bangladeshi	75	180	Single	Bach. Or higher	Cooker	1000-1999	Restaurant	1_5	1_2	With other workers	Filtered	Not aware	No	Yes	Yes, with soap	Yes, with soap	Yes, with soap	>4	No	Valid
	M	23	Bangladeshi	72	160	Single	High School	Cooker	1000-1999	Restaurant	1_5	>2	With other workers	Filtered	Not aware	No	Yes	Yes, with soap	Yes, with soap	Yes, with soap	>4	Yes	Valid
	M	21	Bangladeshi	60	175	Single	High School	Cooker	<1000	Restaurant	1_5	>2	With other workers	Filtered	Not aware	No	Yes	Yes, with soap	Yes, with soap	Yes, with soap	>4	Yes	Valid
	M	32	Bangladeshi	52	160	Married	High School	Waiter and dish washer	1000-1999	Restaurant	1_5	>2	With other workers	Filtered	Not aware	No	Yes	Yes, with soap	Yes, with soap	Yes, with soap	>4	Yes	Valid
	M	30	Bangladeshi	60	170	Single	High School	Cooker	1000-1999	Restaurant	1_5	>2	With other workers	Filtered	Not aware	No	Yes	Yes, with soap	Yes, with soap	Yes, with soap	>4	No	Valid
	M	36	Sudanese	70	180	Married	High School	Waiter and dish washer	2000-2999	Restaurant	1_5	>2	With other workers	Filtered	Aware	No	Yes	Yes, with soap	Yes, with soap	Yes, with soap	>4	Yes	Expired
	M	39	Bangladeshi	67	162	Married	High School	Cooker	1000-1999	Restaurant	1_5	1_2	With other workers	Filtered	Not aware	No	Yes	Yes, with soap	Yes, with soap	Yes, with soap	>4	No	Valid
	M	37	Indian	75	170	Married	Primary School	Waiter and dish washer	1000-1999	Restaurant	6_10	>2	With other workers	Filtered	Aware	No	Yes	Yes, with soap	Yes, with soap	Yes, with soap	>4	No	Valid
	M	29	Nepalese	62	185	Single	High School	Cooker	1000-1999	Restaurant	1_5	1_2	With other workers	Filtered	Not aware	No	Yes	Yes, with soap	Yes, with soap	Yes, with soap	>4	No	Valid
	M	24	Nepalese	58	162	Married	High School	Waiter and dish washer	1000-1999	Restaurant	<1	< 6 Months	With other workers	Filtered	Not aware	No	Yes	Yes, with soap	Yes, with soap	Yes, with soap	>4	No	Expired
	M	52	Syrian	98	175	Divorced	High School	Cooker	>3000	Restaurant	>10	1_2	With other workers	Filtered	Aware	No	Yes	Yes, with soap	Yes, with soap	Yes, with soap	>4	Yes	Valid
	M	25	Egyptian	64	169	Single	High School	Cooker	>3000	Restaurant	1_5	1_2	With other workers	Filtered	Not aware	No	Yes	Yes, with soap	Yes, with soap	Yes, with soap	>4	Yes	Valid
	M	28	Burmese	64	168	Single	Illiterate	Waiter and dish washer	2000-2999	Restaurant	>10	>2	With other workers	Filtered	Not aware	No	Yes	Yes, with soap	Yes, with soap	Yes, with soap	>4	No	Valid
	M	21	Burmese	110	180	Single	Illiterate	Waiter and dish washer	2000-2999	Restaurant	>10	>2	With other workers	Filtered	Not aware	No	Yes	Yes, with soap	Yes, with soap	Yes, with soap	>4	Yes	Valid
	M	27	Moroccan	58	176	Single	Bach. Or higher	Cooker	>3000	Restaurant	1_5	< 6 Months	With other workers	Bottled	Not aware	No	Yes	Yes, with soap	Yes, with soap	Yes, with soap	>4	No	Valid
	M	29	Yemeni	62	160	Single	Bach. Or higher	Cooker	>3000	Restaurant	1_5	>2	With other workers	Bottled	Aware	No	Yes	Yes, without soap	Yes, without soap	Yes, with soap	>4	Yes	Valid
	M	28	Egyptian	103	186	Married	High School	Cooker	>3000	Restaurant	6_10	6-< 12 Months	With other workers	Bottled	Not aware	No	Yes	Yes, without soap	Yes, without soap	Yes, with soap	>4	No	Valid
	M	25	Egyptian	80	175	Single	High School	Cooker	>3000	Restaurant	1_5	1_2	With other workers	Bottled	Not aware	No	Yes	Yes, with soap	Yes, with soap	Yes, with soap	>4	Yes	Valid
	M	26	Egyptian	72	173	Single	High School	Cooker	2000-2999	Coffee	1_5	>2	With other workers	Bottled	Not aware	No	Yes	Yes, with soap	Yes, with soap	Yes, with soap	>4	Yes	Valid
	M	29	Egyptian	74	170	Married	High School	Cooker	2000-2999	Restaurant	1_5	1_2	With other workers	Filtered	Not sure	No	Yes	Yes, with soap	Yes, with soap	Yes, with soap	>4	Yes	Valid
	M	31	Tunisian	85	176	Single	Bach. Or higher	Cooker	>3000	Restaurant	<1	< 6 Months	With other workers	Bottled	Not aware	No	Yes	Yes, with soap	Yes, with soap	Yes, with soap	>4	Yes	Valid
	M	45	Egyptian	98	170	Married	Bach. Or higher	Cooker	2000-2999	Restaurant	>10	< 6 Months	With other workers	Bottled	Not aware	No	Yes	Yes, with soap	Yes, with soap	Yes, with soap	>4	Yes	Valid
	M	46	Syrian	97	162	Married	Middle School	Cooker	>3000	Restaurant	6_10	>2	With family	Filtered	Not sure	No	Yes	Yes, with soap	Yes, with soap	Yes, with soap	>4	Yes	Valid
	M	27	Egyptian	80	159	Single	High School	Cooker	>3000	Bakery	1_5	1_2	With other workers	Filtered	Not aware	No	Yes	Yes, with soap	Yes, without soap	Yes, with soap	>4	No	Valid
	M	32	Egyptian	78	167	Married	High School	Cooker	2000-2999	Bakery	1_5	< 6 Months	With other workers	Bottled	Aware	No	Yes	Yes, with soap	Yes, with soap	Yes, with soap	>4	No	Valid
	M	28	Pakistani	93	190	Married	Bach. Or higher	Cooker	2000-2999	Pizza shop	1_5	1_2	With family	Filtered	Not aware	No	Yes	Yes, with soap	Yes, with soap	Yes, with soap	>4	Yes	Valid
	M	30	Nepalese	52	155	Single	Middle School	Waiter and dish washer	1000-1999	Pizza shop	1_5	>2	With other workers	Bottled	Not aware	No	Yes	Yes, with soap	Yes, with soap	Yes, with soap	>4	Yes	Valid
	M	33	Bangladeshi	92	170	Married	Primary School	Waiter and dish washer	2000-2999	Pizza shop	>10	>2	Alone	Bottled	Not aware	No	Yes	Yes, with soap	Yes, with soap	Yes, with soap	>4	No	Valid
	M	24	Yemeni	50	167	Single	Primary School	Cooker	2000-2999	Ice cream and Juice shop	6_10	>2	With other workers	Bottled	Not sure	No	Yes	Yes, with soap	Yes, without soap	Yes, without soap	>4	No	Valid
	M	27	Yemeni	60	158	Single	Primary School	Cooker	2000-2999	Ice cream and Juice shop	6_10	6-< 12 Months	With other workers	Bottled	Not aware	No	Yes	Yes, without soap	Yes, with soap	Yes, with soap	>4	No	Valid
	M	39	Egyptian	83	173	Married	Bach. Or higher	Cooker	>3000	Restaurant	>10	1_2	Alone	Bottled	Not aware	No	Yes	Yes, with soap	Yes, with soap	Yes, with soap	>4	Yes	Valid
	M	23	Bangladeshi	55	168	Single	Middle School	Cooker	2000-2999	Restaurant	1_5	>2	Alone	Bottled	Aware	No	No	Yes, with soap	Yes, with soap	Yes, with soap	1	Yes	Expired
	M	22	Yemeni	55	165	Single	High School	Waiter and dish washer	1000-1999	Restaurant	1_5	1_2	With other workers	Bottled	Not aware	No	Yes	Yes, with soap	Yes, with soap	Yes, with soap	2_3	No	Expired
	M	25	Egyptian	62	165	Single	Illiterate	Cooker	>3000	Restaurant	6_10	1_2	Alone	Bottled	Not aware	No	Yes	Yes, with soap	Yes, with soap	Yes, with soap	>4	Yes	Valid
	M	38	Syrian	71	168	Single	High School	Waiter and dish washer	2000-2999	Confectionery	>10	< 6 Months	Alone	Bottled	Not sure	No	Yes	Yes, with soap	Yes, with soap	Yes, with soap	>4	No	Expired
	M	24	Syrian	90	174	Married	High School	Cooker	>3000	Confectionery	1_5	>2	With family	Filtered	Not sure	No	Yes	Yes, with soap	Yes, with soap	Yes, with soap	>4	Yes	Expired
	M	22	Turkish	75	177	Single	High School	Cooker	1000-1999	Cafeteria	1_5	1_2	With other workers	Bottled	Aware	No	Yes	Yes, with soap	Yes, with soap	Yes, with soap	>4	Yes	Valid
	M	25	Indian	66	175	Single	High School	Waiter and dish washer	1000-1999	Cafeteria	6_10	1_2	With other workers	Bottled	Not aware	No	Yes	Yes, with soap	Yes, with soap	Yes, with soap	>4	Yes	Valid
	M	44	Turkish	66	173	Married	Primary School	Cooker	1000-1999	Cafeteria	>10	6-< 12 Months	With other workers	Bottled	Aware	No	Yes	Yes, with soap	Yes, with soap	Yes, with soap	>4	Yes	Valid
	M	39	Turkish	58	167	Married	Primary School	Cooker	>3000	Cafeteria	6_10	1_2	With other workers	Bottled	Aware	No	Yes	Yes, with soap	Yes, with soap	Yes, with soap	>4	No	Valid
	M	40	Turkish	80	170	Married	Primary School	Cooker	1000-1999	Cafeteria	>10	6-< 12 Months	With other workers	Filtered	Aware	No	Yes	Yes, with soap	Yes, with soap	Yes, with soap	>4	No	Valid
	M	27	Yemeni	60	176	Single	Bach. Or higher	Cooker	2000-2999	Ice cream and Juice shop	1_5	>2	With other workers	Bottled	Not aware	No	Yes	Yes, with soap	Yes, without soap	Yes, with soap	>4	No	Valid
	M	39	Indian	61	175	Married	High School	Cooker	<1000	Pizza shop	1_5	1_2	With other workers	Bottled	Not aware	No	Yes	Yes, with soap	Yes, with soap	Yes, with soap	>4	Yes	Expired
	M	46	Indian	79	168	Married	High School	Cooker	1000-1999	Pizza shop	>10	1_2	With other workers	Bottled	Not aware	No	Yes	Yes, with soap	Yes, with soap	Yes, with soap	>4	Yes	Valid
	M	30	Bangladeshi	65	160	Single	Primary School	Cooker	2000-2999	Confectionery	1_5	>2	With other workers	Filtered	Not aware	No	Yes	Yes, with soap	Yes, with soap	Yes, with soap	>4	Yes	Valid
	M	38	Nepalese	72	165	Married	High School	Cooker	2000-2999	Confectionery	>10	>2	With other workers	Filtered	Not aware	Yes	Yes	Yes, with soap	Yes, with soap	Yes, with soap	>4	No	Expired
	M	41	Yemeni	82	168	Married	Primary School	Cooker	1000-1999	Restaurant	>10	>2	With family	Filtered	Not aware	No	Yes	Yes, with soap	Yes, with soap	Yes, without soap	>4	No	Valid
	M	46	Syrian	63	160	Married	Primary School	Cooker	2000-2999	Cafeteria	>10	>2	With family	Bottled	Not aware	No	Yes	Yes, with soap	Yes, with soap	Yes, with soap	>4	No	Expired
	M	65	Syrian	85	165	Married	High School	Waiter and dish washer	2000-2999	Cafeteria	>10	>2	With family	Filtered	Not aware	No	Yes	Yes, with soap	Yes, with soap	Yes, with soap	>4	No	Expired
	M	32	Bangladeshi	60	160	Married	Illiterate	Cooker	1000-1999	Cafeteria	1_5	>2	With other workers	Bottled	Not aware	Yes	Yes	Yes, with soap	Yes, with soap	Yes, with soap	>4	Yes	Valid
	M	55	Afghan	88	172	Married	Primary School	Cooker	2000-2999	Bakery	>10	1_2	With other workers	Bottled	Not aware	Yes	No	Yes, with soap	Yes, without soap	Yes, with soap	>4	No	Valid
	M	33	Afghan	90	173	Married	Middle School	Cooker	2000-2999	Bakery	6_10	>2	With other workers	Bottled	Aware	No	No	Yes, with soap	Yes, with soap	Yes, with soap	>4	Yes	Valid
	M	35	Bangladeshi	60	160	Married	Illiterate	Waiter and dish washer	1000-1999	Cafeteria	>10	>2	Alone	Bottled	Not aware	No	Yes	Yes, with soap	Yes, with soap	Yes, with soap	>4	No	Valid
	M	31	Egyptian	62	167	Single	Bach. Or higher	Cooker	2000-2999	Cafeteria	>10	>2	Alone	Bottled	Not aware	No	Yes	Yes, without soap	Yes, without soap	Yes, with soap	>4	No	Valid
	M	40	Bangladeshi	78	170	Married	Primary School	Cooker	2000-2999	Cafeteria	>10	1_2	Alone	Bottled	Not aware	No	No	Yes, with soap	Yes, with soap	Yes, with soap	>4	Yes	Expired
	M	24	Yemeni	52	172	Single	Primary School	Cooker	2000-2999	Confectionery	1_5	>2	With other workers	Filtered	Not aware	No	Yes	Yes, with soap	Yes, with soap	Yes, with soap	>4	No	Valid
	M	34	Yemeni	77	177	Married	Middle School	Cooker	1000-1999	Confectionery	>10	6-< 12 Months	With other workers	Bottled	Aware	No	Yes	Yes, with soap	Yes, with soap	Yes, with soap	>4	Yes	Valid
	M	25	Indian	92	185	Single	High School	Cooker	1000-1999	Restaurant	1_5	>2	With other workers	Bottled	Not aware	No	Yes	Yes, with soap	Yes, with soap	Yes, with soap	>4	Yes	Valid
	M	26	Indian	96	180	Single	High School	Cooker	1000-1999	Restaurant	1_5	< 6 Months	With other workers	Filtered	Not aware	No	Yes	Yes, with soap	Yes, with soap	Yes, with soap	>4	No	Valid
	M	38	Indian	75	180	Married	Middle School	Cooker	1000-1999	Restaurant	6_10	>2	With other workers	Filtered	Not aware	No	Yes	Yes, without soap	Yes, with soap	Yes, without soap	>4	No	Valid
	M	32	Egyptian	75	170	Married	High School	Cooker	2000-2999	Cafeteria	1_5	< 6 Months	With other workers	Bottled	Aware	No	Yes	Yes, with soap	Yes, with soap	Yes, with soap	>4	No	Expired
	M	56	Egyptian	100	171	Married	Illiterate	Cooker	2000-2999	Cafeteria	>10	6-< 12 Months	Alone	Bottled	Aware	No	Yes	Yes, with soap	Yes, with soap	Yes, with soap	>4	No	Expired
	M	25	Bangladeshi	65	176	Single	High School	Cooker	2000-2999	Cafeteria	1_5	>2	Alone	Bottled	Not aware	No	Yes	Yes, with soap	Yes, with soap	Yes, with soap	>4	No	Valid
	M	28	Yemeni	68	166	Married	Primary School	Cooker	>3000	Cafeteria	6_10	1_2	With other workers	Bottled	Not aware	Yes	Yes	Yes, with soap	Yes, with soap	Yes, with soap	>4	Yes	Valid
	M	26	Yemeni	85	175	Married	High School	Cooker	2000-2999	Cafeteria	6_10	1_2	With other workers	Bottled	Not aware	No	Yes	Yes, with soap	Yes, with soap	Yes, with soap	>4	No	Valid
	M	42	Syrian	83	178	Married	High School	Cooker	>3000	Cafeteria	>10	1_2	With other workers	Filtered	Aware	No	Yes	Yes, with soap	Yes, with soap	Yes, with soap	>4	Yes	Valid

## Sheet: Participants Information
Name	Gender	Age	Nationality	Weight	Height	Marital status	Educational status	Responsibility	Monthly income	Establishment type	Residency in KSA	Stay from last vac.	Accommodation type	Drinking water source	Awareness about I.P.	Abdominal symptoms	Uniform, Gown, Gloves	W.H. bef. Handling, preparing food	W.H. bef. meals	W.H. after toilet	Frequency of shower	Trimmed nails	Valid. Health card
	M	41	Bangladeshi	65	168	Married	Primary School	Waiter and dish washer	1000-1999	Restaurant	>10	>2	With other workers	Bottled	Aware	No	Yes	Yes, with soap	Yes, with soap	Yes, with soap	>4	Yes	Valid
	M	50	Bangladeshi	65	160	Married	Primary School	Cooker	2000-2999	Restaurant	>10	>2	With other workers	Bottled	Aware	No	Yes	Yes, with soap	Yes, with soap	Yes, with soap	>4	Yes	Valid
	M	45	Bangladeshi	73	175	Married	Primary School	Cooker	2000-2999	Restaurant	>10	1_2	With other workers	Bottled	Not aware	No	Yes	Yes, with soap	Yes, with soap	Yes, with soap	>4	No	Valid
	M	50	Bangladeshi	75	177	Married	Primary School	Waiter and dish washer	2000-2999	Restaurant	>10	1_2	With other workers	Bottled	Aware	No	Yes	Yes, with soap	Yes, with soap	Yes, with soap	>4	Yes	Valid
	M	30	Afghan	80	178	Married	Illiterate	Cooker	>3000	Restaurant	6_10	>2	With other workers	Filtered	Aware	No	Yes	Yes, with soap	Yes, with soap	Yes, with soap	>4	Yes	Valid
	M	40	Bangladeshi	60	160	Married	Primary School	Waiter and dish washer	2000-2999	Restaurant	>10	>2	With other workers	Bottled	Aware	No	No	Yes, with soap	Yes, with soap	Yes, with soap	>4	No	Valid
	M	55	Pakistani	60	168	Married	Primary School	Cooker	2000-2999	Restaurant	>10	>2	With other workers	Filtered	Aware	No	No	Yes, with soap	Yes, without soap	Yes, with soap	>4	Yes	Expired
	M	30	Pakistani	85	180	Married	Primary School	Cooker	1000-1999	Restaurant	6_10	1_2	With other workers	Filtered	Not aware	No	Yes	Yes, with soap	Yes, with soap	Yes, with soap	>4	Yes	Valid
	M	45	Indian	55	158	Married	Illiterate	Cooker	2000-2999	Restaurant	>10	>2	With other workers	Filtered	Not aware	No	Yes	Yes, with soap	Yes, with soap	Yes, with soap	>4	No	Expired
	M	40	Bangladeshi	72	170	Married	High School	Cooker	1000-1999	Restaurant	>10	>2	With other workers	Filtered	Aware	No	Yes	Yes, with soap	Yes, with soap	Yes, with soap	>4	Yes	Valid
	M	42	Afghan	82	178	Married	Primary School	Cooker	2000-2999	Restaurant	>10	1_2	With other workers	Bottled	Not aware	No	Yes	Yes, with soap	Yes, with soap	Yes, with soap	2_3	No	Valid
	M	28	Afghan	68	170	Married	High School	Serving both	1000-1999	Restaurant	1_5	< 6 Months	With other workers	Bottled	Not aware	No	Yes	Yes, with soap	Yes, with soap	Yes, with soap	2_3	No	Valid
	M	30	Indian	80	175	Married	Middle School	Waiter and dish washer	1000-1999	Restaurant	6_10	>2	With other workers	Filtered	Aware	No	Yes	Yes, with soap	Yes, with soap	Yes, with soap	>4	Yes	Valid
	M	25	Pakistani	75	180	Single	Illiterate	Cooker	2000-2999	Restaurant	6_10	>2	With other workers	Filtered	Not aware	No	Yes	Yes, with soap	Yes, with soap	Yes, with soap	2_3	Yes	Valid
	M	32	Pakistani	77	175	Married	Primary School	Cooker	1000-1999	Restaurant	6_10	>2	With other workers	Bottled	Not aware	No	Yes	Yes, with soap	Yes, with soap	Yes, with soap	>4	No	Valid
	M	34	Pakistani	87	175	Married	Primary School	Cooker	1000-1999	Restaurant	<1	< 6 Months	With other workers	Bottled	Not aware	No	Yes	Yes, with soap	Yes, with soap	Yes, with soap	>4	No	Valid
	M	20	Pakistani	60	185	Single	High School	Cooker	1000-1999	Restaurant	<1	< 6 Months	With other workers	Bottled	Not aware	No	Yes	Yes, with soap	Yes, with soap	Yes, with soap	>4	No	Valid
	M	25	Afghan	60	160	Married	Illiterate	Cooker	1000-1999	Restaurant	6_10	>2	With other workers	Bottled	Not aware	No	Yes	Yes, with soap	Yes, with soap	Yes, with soap	>4	No	Valid
	M	28	Afghan	62	185	Single	Middle School	Cooker	2000-2999	Restaurant	6_10	>2	With other workers	Bottled	Not aware	No	Yes	Yes, with soap	Yes, with soap	Yes, with soap	>4	Yes	Valid
	M	28	Afghan	74	175	Married	High School	Cooker	1000-1999	Restaurant	6_10	>2	With other workers	Bottled	Not aware	No	Yes	Yes, with soap	Yes, with soap	Yes, with soap	>4	Yes	Valid
	M	38	Jordanian	97	172	Married	Bach. Or higher	Waiter and dish washer	>3000	Restaurant	>10	< 6 Months	With other workers	Bottled	Not aware	No	Yes	Yes, with soap	Yes, with soap	Yes, with soap	>4	Yes	Valid
	M	31	Egyptian	85	179	Married	High School	Cooker	2000-2999	Restaurant	1_5	< 6 Months	With other workers	Bottled	Not aware	No	Yes	Yes, with soap	Yes, without soap	Yes, with soap	>4	Yes	Valid
	M	36	Egyptian	105	186	Married	High School	Cooker	2000-2999	Restaurant	1_5	1_2	With other workers	Filtered	Not aware	No	Yes	Yes, with soap	Yes, with soap	Yes, with soap	>4	Yes	Valid
	M	33	Egyptian	96	175	Married	Middle School	Cooker	2000-2999	Restaurant	6_10	< 6 Months	With other workers	Filtered	Not aware	No	Yes	Yes, with soap	Yes, without soap	Yes, without soap	>4	Yes	Valid
	M	23	Bangladeshi	63	168	Single	High School	Waiter and dish washer	1000-1999	Restaurant	1_5	>2	With other workers	Filtered	Not aware	No	Yes	Yes, with soap	Yes, with soap	Yes, with soap	>4	No	Valid
	M	38	Indian	77	172	Married	Middle School	Cooker	<1000	Cafeteria	>10	>2	With other workers	Filtered	Not aware	No	Yes	Yes, without soap	Yes, without soap	Yes, without soap	>4	Yes	Valid
	M	28	Indian	65	170	Married	High School	Cooker	<1000	Cafeteria	1_5	1_2	With other workers	Filtered	Not aware	No	Yes	Yes, without soap	Yes, without soap	Yes, without soap	>4	No	Valid
	M	49	Indian	55	160	Married	Primary School	Cooker	<1000	Cafeteria	6_10	>2	With other workers	Filtered	Not aware	No	Yes	Yes, without soap	Yes, without soap	Yes, without soap	>4	No	Valid
	M	26	Afghan	90	178	Married	Illiterate	Cooker	2000-2999	Restaurant	6_10	>2	With other workers	Bottled	Not aware	Yes	Yes	Yes, with soap	Yes, with soap	Yes, with soap	2_3	No	Valid
	M	32	Pakistani	87	185	Married	Illiterate	Cooker	2000-2999	Restaurant	6_10	< 6 Months	With other workers	Filtered	Not aware	No	Yes	Yes, with soap	Yes, with soap	Yes, with soap	>4	No	Valid
	M	28	Pakistani	88	168	Married	Illiterate	Cooker	2000-2999	Restaurant	6_10	>2	With other workers	Bottled	Not aware	No	Yes	Yes, with soap	Yes, with soap	Yes, with soap	>4	Yes	Valid
	M	20	Burmese	57	170	Single	High School	Waiter and dish washer	2000-2999	Restaurant	>10	>2	With other workers	Bottled	Not sure	No	Yes	Yes, with soap	Yes, without soap	Yes, with soap	2_3	No	Expired
	M	31	Pakistani	50	148	Married	High School	Cooker	1000-1999	Restaurant	1_5	1_2	With other workers	Filtered	Not aware	No	Yes	Yes, with soap	Yes, with soap	Yes, with soap	>4	No	Expired
	M	45	Bangladeshi	80	168	Married	High School	Cooker	2000-2999	Restaurant	>10	>2	With other workers	Filtered	Not aware	No	Yes	Yes, with soap	Yes, with soap	Yes, with soap	>4	No	Expired
	M	39	Nepalese	52	150	Married	High School	Waiter and dish washer	2000-2999	Restaurant	>10	< 6 Months	With other workers	Filtered	Not aware	No	Yes	Yes, with soap	Yes, with soap	Yes, with soap	>4	Yes	Valid
	M	23	Bangladeshi	50	158	Single	High School	Cooker	1000-1999	Restaurant	<1	6-< 12 Months	With other workers	Filtered	Aware	No	Yes	Yes, with soap	Yes, with soap	Yes, with soap	>4	No	Valid
	M	22	Yemeni	55	160	Single	Middle School	Cooker	2000-2999	Restaurant	1_5	1_2	With other workers	Filtered	Not aware	No	Yes	Yes, with soap	Yes, with soap	Yes, with soap	>4	Yes	Expired
	M	38	Bangladeshi	68	158	Married	High School	Cooker	1000-1999	Restaurant	1_5	>2	With other workers	Filtered	Aware	No	Yes	Yes, with soap	Yes, with soap	Yes, with soap	>4	Yes	Expired
	M	37	Bangladeshi	65	160	Married	High School	Waiter and dish washer	1000-1999	Restaurant	1_5	1_2	With other workers	Filtered	Not aware	No	Yes	Yes, with soap	Yes, with soap	Yes, with soap	>4	Yes	Expired
	M	23	Burmese	70	168	Single	Middle School	Waiter and dish washer	2000-2999	Restaurant	>10	>2	With other workers	Filtered	Aware	No	Yes	Yes, with soap	Yes, with soap	Yes, with soap	>4	No	Expired
	M	39	Nepalese	65	168	Married	Primary School	Cooker	2000-2999	Restaurant	>10	>2	With other workers	Filtered	Not aware	No	Yes	Yes, with soap	Yes, with soap	Yes, with soap	>4	Yes	Expired
	M	30	Indian	52	165	Married	High School	Waiter and dish washer	1000-1999	Restaurant	1_5	1_2	With other workers	Filtered	Not aware	No	Yes	Yes, with soap	Yes, with soap	Yes, with soap	>4	Yes	Expired
	M	43	Indian	62	165	Married	Primary School	Cooker	2000-2999	Restaurant	6_10	1_2	With other workers	Filtered	Not aware	No	Yes	Yes, with soap	Yes, with soap	Yes, with soap	>4	No	Expired
	M	53	Yemeni	55	159	Married	Primary School	Cooker	1000-1999	Restaurant	>10	< 6 Months	With other workers	Filtered	Not aware	No	Yes	Yes, with soap	Yes, with soap	Yes, with soap	>4	Yes	Expired
	M	25	Indonesian	52	160	Married	High School	Cooker	1000-1999	Restaurant	1_5	>2	With other workers	Filtered	Aware	No	Yes	Yes, with soap	Yes, with soap	Yes, with soap	>4	Yes	Expired
	M	35	Sudanese	57	170	Married	Primary School	Cooker	2000-2999	Restaurant	1_5	1_2	With other workers	Filtered	Not aware	Yes	Yes	Yes, with soap	Yes, with soap	Yes, with soap	>4	No	Valid
	M	30	Bangladeshi	75	180	Single	Bach. Or higher	Cooker	1000-1999	Restaurant	1_5	1_2	With other workers	Filtered	Not aware	No	Yes	Yes, with soap	Yes, with soap	Yes, with soap	>4	No	Valid
	M	23	Bangladeshi	72	160	Single	High School	Cooker	1000-1999	Restaurant	1_5	>2	With other workers	Filtered	Not aware	No	Yes	Yes, with soap	Yes, with soap	Yes, with soap	>4	Yes	Valid
	M	21	Bangladeshi	60	175	Single	High School	Cooker	<1000	Restaurant	1_5	>2	With other workers	Filtered	Not aware	No	Yes	Yes, with soap	Yes, with soap	Yes, with soap	>4	Yes	Valid
	M	32	Bangladeshi	52	160	Married	High School	Waiter and dish washer	1000-1999	Restaurant	1_5	>2	With other workers	Filtered	Not aware	No	Yes	Yes, with soap	Yes, with soap	Yes, with soap	>4	Yes	Valid
	M	30	Bangladeshi	60	170	Single	High School	Cooker	1000-1999	Restaurant	1_5	>2	With other workers	Filtered	Not aware	No	Yes	Yes, with soap	Yes, with soap	Yes, with soap	>4	No	Valid
	M	36	Sudanese	70	180	Married	High School	Waiter and dish washer	2000-2999	Restaurant	1_5	>2	With other workers	Filtered	Aware	No	Yes	Yes, with soap	Yes, with soap	Yes, with soap	>4	Yes	Expired
	M	39	Bangladeshi	67	162	Married	High School	Cooker	1000-1999	Restaurant	1_5	1_2	With other workers	Filtered	Not aware	No	Yes	Yes, with soap	Yes, with soap	Yes, with soap	>4	No	Valid
	M	37	Indian	75	170	Married	Primary School	Waiter and dish washer	1000-1999	Restaurant	6_10	>2	With other workers	Filtered	Aware	No	Yes	Yes, with soap	Yes, with soap	Yes, with soap	>4	No	Valid
	M	29	Nepalese	62	185	Single	High School	Cooker	1000-1999	Restaurant	1_5	1_2	With other workers	Filtered	Not aware	No	Yes	Yes, with soap	Yes, with soap	Yes, with soap	>4	No	Valid
	M	24	Nepalese	58	162	Married	High School	Waiter and dish washer	1000-1999	Restaurant	<1	< 6 Months	With other workers	Filtered	Not aware	No	Yes	Yes, with soap	Yes, with soap	Yes, with soap	>4	No	Expired
	M	52	Syrian	98	175	Divorced	High School	Cooker	>3000	Restaurant	>10	1_2	With other workers	Filtered	Aware	No	Yes	Yes, with soap	Yes, with soap	Yes, with soap	>4	Yes	Valid
	M	25	Egyptian	64	169	Single	High School	Cooker	>3000	Restaurant	1_5	1_2	With other workers	Filtered	Not aware	No	Yes	Yes, with soap	Yes, with soap	Yes, with soap	>4	Yes	Valid
	M	28	Burmese	64	168	Single	Illiterate	Waiter and dish washer	2000-2999	Restaurant	>10	>2	With other workers	Filtered	Not aware	No	Yes	Yes, with soap	Yes, with soap	Yes, with soap	>4	No	Valid
	M	21	Burmese	110	180	Single	Illiterate	Waiter and dish washer	2000-2999	Restaurant	>10	>2	With other workers	Filtered	Not aware	No	Yes	Yes, with soap	Yes, with soap	Yes, with soap	>4	Yes	Valid
	M	27	Moroccan	58	176	Single	Bach. Or higher	Cooker	>3000	Restaurant	1_5	< 6 Months	With other workers	Bottled	Not aware	No	Yes	Yes, with soap	Yes, with soap	Yes, with soap	>4	No	Valid
	M	29	Yemeni	62	160	Single	Bach. Or higher	Cooker	>3000	Restaurant	1_5	>2	With other workers	Bottled	Aware	No	Yes	Yes, without soap	Yes, without soap	Yes, with soap	>4	Yes	Valid
	M	28	Egyptian	103	186	Married	High School	Cooker	>3000	Restaurant	6_10	6-< 12 Months	With other workers	Bottled	Not aware	No	Yes	Yes, without soap	Yes, without soap	Yes, with soap	>4	No	Valid
	M	25	Egyptian	80	175	Single	High School	Cooker	>3000	Restaurant	1_5	1_2	With other workers	Bottled	Not aware	No	Yes	Yes, with soap	Yes, with soap	Yes, with soap	>4	Yes	Valid
	M	26	Egyptian	72	173	Single	High School	Cooker	2000-2999	Coffee	1_5	>2	With other workers	Bottled	Not aware	No	Yes	Yes, with soap	Yes, with soap	Yes, with soap	>4	Yes	Valid
	M	29	Egyptian	74	170	Married	High School	Cooker	2000-2999	Restaurant	1_5	1_2	With other workers	Filtered	Not sure	No	Yes	Yes, with soap	Yes, with soap	Yes, with soap	>4	Yes	Valid
	M	31	Tunisian	85	176	Single	Bach. Or higher	Cooker	>3000	Restaurant	<1	< 6 Months	With other workers	Bottled	Not aware	No	Yes	Yes, with soap	Yes, with soap	Yes, with soap	>4	Yes	Valid
	M	45	Egyptian	98	170	Married	Bach. Or higher	Cooker	2000-2999	Restaurant	>10	< 6 Months	With other workers	Bottled	Not aware	No	Yes	Yes, with soap	Yes, with soap	Yes, with soap	>4	Yes	Valid
	M	46	Syrian	97	162	Married	Middle School	Cooker	>3000	Restaurant	6_10	>2	With family	Filtered	Not sure	No	Yes	Yes, with soap	Yes, with soap	Yes, with soap	>4	Yes	Valid
	M	27	Egyptian	80	159	Single	High School	Cooker	>3000	Bakery	1_5	1_2	With other workers	Filtered	Not aware	No	Yes	Yes, with soap	Yes, without soap	Yes, with soap	>4	No	Valid
	M	32	Egyptian	78	167	Married	High School	Cooker	2000-2999	Bakery	1_5	< 6 Months	With other workers	Bottled	Aware	No	Yes	Yes, with soap	Yes, with soap	Yes, with soap	>4	No	Valid
	M	28	Pakistani	93	190	Married	Bach. Or higher	Cooker	2000-2999	Pizza shop	1_5	1_2	With family	Filtered	Not aware	No	Yes	Yes, with soap	Yes, with soap	Yes, with soap	>4	Yes	Valid
	M	30	Nepalese	52	155	Single	Middle School	Waiter and dish washer	1000-1999	Pizza shop	1_5	>2	With other workers	Bottled	Not aware	No	Yes	Yes, with soap	Yes, with soap	Yes, with soap	>4	Yes	Valid
	M	33	Bangladeshi	92	170	Married	Primary School	Waiter and dish washer	2000-2999	Pizza shop	>10	>2	Alone	Bottled	Not aware	No	Yes	Yes, with soap	Yes, with soap	Yes, with soap	>4	No	Valid
	M	24	Yemeni	50	167	Single	Primary School	Cooker	2000-2999	Ice cream and Juice shop	6_10	>2	With other workers	Bottled	Not sure	No	Yes	Yes, with soap	Yes, without soap	Yes, without soap	>4	No	Valid
	M	27	Yemeni	60	158	Single	Primary School	Cooker	2000-2999	Ice cream and Juice shop	6_10	6-< 12 Months	With other workers	Bottled	Not aware	No	Yes	Yes, without soap	Yes, with soap	Yes, with soap	>4	No	Valid
	M	39	Egyptian	83	173	Married	Bach. Or higher	Cooker	>3000	Restaurant	>10	1_2	Alone	Bottled	Not aware	No	Yes	Yes, with soap	Yes, with soap	Yes, with soap	>4	Yes	Valid
	M	23	Bangladeshi	55	168	Single	Middle School	Cooker	2000-2999	Restaurant	1_5	>2	Alone	Bottled	Aware	No	No	Yes, with soap	Yes, with soap	Yes, with soap	1	Yes	Expired
	M	22	Yemeni	55	165	Single	High School	Waiter and dish washer	1000-1999	Restaurant	1_5	1_2	With other workers	Bottled	Not aware	No	Yes	Yes, with soap	Yes, with soap	Yes, with soap	2_3	No	Expired
	M	25	Egyptian	62	165	Single	Illiterate	Cooker	>3000	Restaurant	6_10	1_2	Alone	Bottled	Not aware	No	Yes	Yes, with soap	Yes, with soap	Yes, with soap	>4	Yes	Valid
	M	38	Syrian	71	168	Single	High School	Waiter and dish washer	2000-2999	Confectionery	>10	< 6 Months	Alone	Bottled	Not sure	No	Yes	Yes, with soap	Yes, with soap	Yes, with soap	>4	No	Expired
	M	24	Syrian	90	174	Married	High School	Cooker	>3000	Confectionery	1_5	>2	With family	Filtered	Not sure	No	Yes	Yes, with soap	Yes, with soap	Yes, with soap	>4	Yes	Expired
	M	22	Turkish	75	177	Single	High School	Cooker	1000-1999	Cafeteria	1_5	1_2	With other workers	Bottled	Aware	No	Yes	Yes, with soap	Yes, with soap	Yes, with soap	>4	Yes	Valid
	M	25	Indian	66	175	Single	High School	Waiter and dish washer	1000-1999	Cafeteria	6_10	1_2	With other workers	Bottled	Not aware	No	Yes	Yes, with soap	Yes, with soap	Yes, with soap	>4	Yes	Valid
	M	44	Turkish	66	173	Married	Primary School	Cooker	1000-1999	Cafeteria	>10	6-< 12 Months	With other workers	Bottled	Aware	No	Yes	Yes, with soap	Yes, with soap	Yes, with soap	>4	Yes	Valid
	M	39	Turkish	58	167	Married	Primary School	Cooker	>3000	Cafeteria	6_10	1_2	With other workers	Bottled	Aware	No	Yes	Yes, with soap	Yes, with soap	Yes, with soap	>4	No	Valid
	M	40	Turkish	80	170	Married	Primary School	Cooker	1000-1999	Cafeteria	>10	6-< 12 Months	With other workers	Filtered	Aware	No	Yes	Yes, with soap	Yes, with soap	Yes, with soap	>4	No	Valid
	M	27	Yemeni	60	176	Single	Bach. Or higher	Cooker	2000-2999	Ice cream and Juice shop	1_5	>2	With other workers	Bottled	Not aware	No	Yes	Yes, with soap	Yes, without soap	Yes, with soap	>4	No	Valid
	M	39	Indian	61	175	Married	High School	Cooker	<1000	Pizza shop	1_5	1_2	With other workers	Bottled	Not aware	No	Yes	Yes, with soap	Yes, with soap	Yes, with soap	>4	Yes	Expired
	M	46	Indian	79	168	Married	High School	Cooker	1000-1999	Pizza shop	>10	1_2	With other workers	Bottled	Not aware	No	Yes	Yes, with soap	Yes, with soap	Yes, with soap	>4	Yes	Valid
	M	30	Bangladeshi	65	160	Single	Primary School	Cooker	2000-2999	Confectionery	1_5	>2	With other workers	Filtered	Not aware	No	Yes	Yes, with soap	Yes, with soap	Yes, with soap	>4	Yes	Valid
	M	38	Nepalese	72	165	Married	High School	Cooker	2000-2999	Confectionery	>10	>2	With other workers	Filtered	Not aware	Yes	Yes	Yes, with soap	Yes, with soap	Yes, with soap	>4	No	Expired
	M	41	Yemeni	82	168	Married	Primary School	Cooker	1000-1999	Restaurant	>10	>2	With family	Filtered	Not aware	No	Yes	Yes, with soap	Yes, with soap	Yes, without soap	>4	No	Valid
	M	46	Syrian	63	160	Married	Primary School	Cooker	2000-2999	Cafeteria	>10	>2	With family	Bottled	Not aware	No	Yes	Yes, with soap	Yes, with soap	Yes, with soap	>4	No	Expired
	M	65	Syrian	85	165	Married	High School	Waiter and dish washer	2000-2999	Cafeteria	>10	>2	With family	Filtered	Not aware	No	Yes	Yes, with soap	Yes, with soap	Yes, with soap	>4	No	Expired
	M	32	Bangladeshi	60	160	Married	Illiterate	Cooker	1000-1999	Cafeteria	1_5	>2	With other workers	Bottled	Not aware	Yes	Yes	Yes, with soap	Yes, with soap	Yes, with soap	>4	Yes	Valid
	M	55	Afghan	88	172	Married	Primary School	Cooker	2000-2999	Bakery	>10	1_2	With other workers	Bottled	Not aware	Yes	No	Yes, with soap	Yes, without soap	Yes, with soap	>4	No	Valid
	M	33	Afghan	90	173	Married	Middle School	Cooker	2000-2999	Bakery	6_10	>2	With other workers	Bottled	Aware	No	No	Yes, with soap	Yes, with soap	Yes, with soap	>4	Yes	Valid
	M	35	Bangladeshi	60	160	Married	Illiterate	Waiter and dish washer	1000-1999	Cafeteria	>10	>2	Alone	Bottled	Not aware	No	Yes	Yes, with soap	Yes, with soap	Yes, with soap	>4	No	Valid
	M	31	Egyptian	62	167	Single	Bach. Or higher	Cooker	2000-2999	Cafeteria	>10	>2	Alone	Bottled	Not aware	No	Yes	Yes, without soap	Yes, without soap	Yes, with soap	>4	No	Valid
	M	40	Bangladeshi	78	170	Married	Primary School	Cooker	2000-2999	Cafeteria	>10	1_2	Alone	Bottled	Not aware	No	No	Yes, with soap	Yes, with soap	Yes, with soap	>4	Yes	Expired
	M	24	Yemeni	52	172	Single	Primary School	Cooker	2000-2999	Confectionery	1_5	>2	With other workers	Filtered	Not aware	No	Yes	Yes, with soap	Yes, with soap	Yes, with soap	>4	No	Valid
	M	34	Yemeni	77	177	Married	Middle School	Cooker	1000-1999	Confectionery	>10	6-< 12 Months	With other workers	Bottled	Aware	No	Yes	Yes, with soap	Yes, with soap	Yes, with soap	>4	Yes	Valid
	M	25	Indian	92	185	Single	High School	Cooker	1000-1999	Restaurant	1_5	>2	With other workers	Bottled	Not aware	No	Yes	Yes, with soap	Yes, with soap	Yes, with soap	>4	Yes	Valid
	M	26	Indian	96	180	Single	High School	Cooker	1000-1999	Restaurant	1_5	< 6 Months	With other workers	Filtered	Not aware	No	Yes	Yes, with soap	Yes, with soap	Yes, with soap	>4	No	Valid
	M	38	Indian	75	180	Married	Middle School	Cooker	1000-1999	Restaurant	6_10	>2	With other workers	Filtered	Not aware	No	Yes	Yes, without soap	Yes, with soap	Yes, without soap	>4	No	Valid
	M	32	Egyptian	75	170	Married	High School	Cooker	2000-2999	Cafeteria	1_5	< 6 Months	With other workers	Bottled	Aware	No	Yes	Yes, with soap	Yes, with soap	Yes, with soap	>4	No	Expired
	M	56	Egyptian	100	171	Married	Illiterate	Cooker	2000-2999	Cafeteria	>10	6-< 12 Months	Alone	Bottled	Aware	No	Yes	Yes, with soap	Yes, with soap	Yes, with soap	>4	No	Expired
	M	25	Bangladeshi	65	176	Single	High School	Cooker	2000-2999	Cafeteria	1_5	>2	Alone	Bottled	Not aware	No	Yes	Yes, with soap	Yes, with soap	Yes, with soap	>4	No	Valid
	M	28	Yemeni	68	166	Married	Primary School	Cooker	>3000	Cafeteria	6_10	1_2	With other workers	Bottled	Not aware	Yes	Yes	Yes, with soap	Yes, with soap	Yes, with soap	>4	Yes	Valid
	M	26	Yemeni	85	175	Married	High School	Cooker	2000-2999	Cafeteria	6_10	1_2	With other workers	Bottled	Not aware	No	Yes	Yes, with soap	Yes, with soap	Yes, with soap	>4	No	Valid
	M	42	Syrian	83	178	Married	High School	Cooker	>3000	Cafeteria	>10	1_2	With other workers	Filtered	Aware	No	Yes	Yes, with soap	Yes, with soap	Yes, with soap	>4	Yes	Valid
							Age
							Mean	33.5
							Standard Error	0.869548
							Median	31
							Mode	28
							Standard Deviation	9.20243
							Sample Variance	84.6847
							Kurtosis	0.458072
							Skewness	0.878762
							Range	45
							Minimum	20
							Maximum	65
							Sum	3752
							Count	112
